# Supplementary material for: Ferroptosis-related gene SLC1A5 is a novel prognostic biomarker and correlates with immune infiltrates in stomach adenocarcinoma
Source: Springer Nature journal article supplement (doi:10.1186/s12935-022-02544-8), 2022-03-19
Supplement: MOESM2 [file 20235504]

---

**Table S2. Primer sequences used in the qRT-PCR assay**

---

| <b>Primer</b>     | <b>Sequence (5'–3')</b>   |
|-------------------|---------------------------|
| <b>SLC1A5-For</b> | ACTGCCCCTCATCTACTTCCTCTTC |
| <b>SLC1A5-Rev</b> | CTCCTCCACGCACTTCATCATCAG  |
| <b>GAPDH-For</b>  | CTTTGGTATCGTGGAAGGA       |
| <b>GAPDH-Rev</b>  | CACCCTGTTGCTGTAGCC        |

---
