# Supplementary material for: Ferroptosis-related gene SLC1A5 is a novel prognostic biomarker and correlates with immune infiltrates in stomach adenocarcinoma
Source: Springer Nature journal article supplement (doi:10.1186/s12935-022-02544-8), 2022-03-19

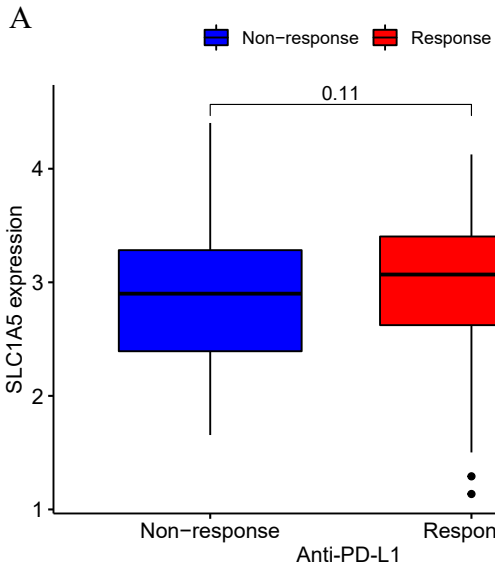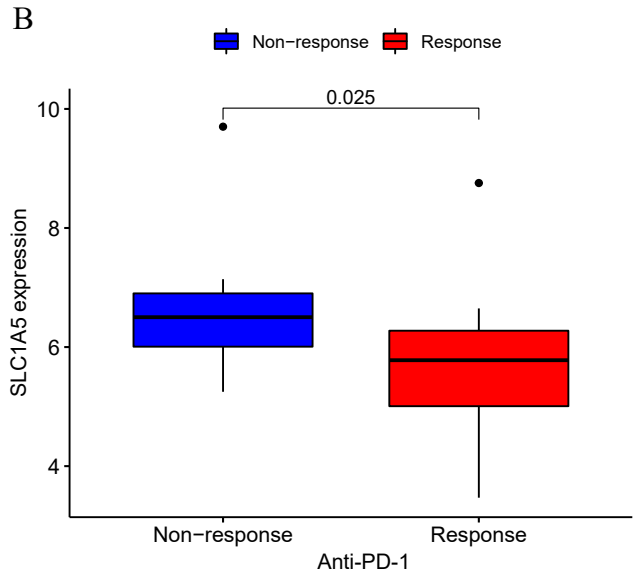

Supplement: MOESM5 [file 20235504]
